# Supplementary material
Source: PubMed Central journal article supplement (PMC3194993)
Supplement: supp_55_11_5205__1.pdf [file supp_55_11_5205__1.pdf]

**A Novel Target-Specific, Salt-Resistant Antimicrobial Peptide against  
the Cariogenic Pathogen *Streptococcus mutans***

Junni Mai<sup>1,4</sup>, Xiao-Lin Tian<sup>1</sup>, Jeffrey W. Gallant<sup>3</sup>, Nadine Merkley<sup>3</sup>, Zakia Biswas<sup>3</sup>

Raymond Syvitski<sup>3</sup>, Susan E. Douglas<sup>2,3</sup>, Junqi Ling<sup>4</sup> and Yung-Hua Li<sup>1,2\*</sup>

Department of Applied Oral Sciences<sup>1</sup>

Department of Microbiology and Immunology<sup>2</sup>

Dalhousie University, Halifax, Canada

Institute for Marine Biosciences<sup>3</sup>

National Research Council of Canada, Halifax, Canada

Guanghua School of Stomatology<sup>4</sup>

Sun Yat-Sen University, Guangzhou, China

**Supplemental Materials**

**\*: Corresponding Author**

Mailing Address:

5981 University Ave. Rm5215

Halifax, Nova Scotia

Canada, B3H 3J5

Tel: 1-902-494-3063

Fax: 1-902-494-6621

E-mail: [yung-hua.li@dal.ca](mailto:yung-hua.li@dal.ca)

**Table S1 Antimicrobial Activity of Pleurocidin Variants against *S. mutans* UA159**

| Name of peptide | Sequence of peptide          | MIC (µg/ml) |
|-----------------|------------------------------|-------------|
| NRC-1           | GKGRWLERIGKAGGIIIGGALDHL*    | 32-64       |
| NRC-2           | WLRRIGKGVKIIGGAALDHL*        | 32          |
| NRC-3           | GRRKRKWLRRIGKGVKIIGGAALDHL*  | 4           |
| NRC-4           | GWGSFFKKAHVGVGKHAALDHL*      | 2           |
| NRC-5           | FLGALIKGAIHGGRFIHGMIQNHH*    | 4           |
| NRC-6           | GWGSIFKHGRHAAKHIGHAAVNHYL*   | 4           |
| NRC-7           | RWGKWFKKATHVGVGKHAALDHL*     | 2           |
| NRC-8           | RSTEDIKSISSGGGFLNAMNA*       | >128        |
| NRC-9           | FFRLLFHGVHHGGGYLNAA*         | >128        |
| NRC-10          | FFRLLFHGVHHVGVGKIKPRA*       | 4-8         |
| NRC-11          | GWKSVFRKAKKVGKTVGGLALDHYL*   | 8           |
| NRC-12          | GWKKWFNRKAKKVGKTVGGLAVDHYL*  | 8           |
| NRC-13          | GWRTLLKKAEVKTVGKLALKHYL*     | 16          |
| NRC-14          | AGWGSIFKHIFKAGKFIHGAIQAHND*  | 4-8         |
| NRC-15          | GFWGKLFKLGLHGIGLLHLHL*       | 16-32       |
| NRC-16          | GWKKWLRKGAKHLGQAAIK*         | 4-8         |
| NRC-17          | GWKKWLRKGAKHLGQAAIKGLAS      | 8-16        |
| NRC-18          | GWKKWFTKGERLSQRHFA           | >128        |
| NRC-19          | FLGLLFHGVHHVGVGKWIHGLIHGHH*  | 16-32       |
| NRC-20          | GFLGILFHGVHHGRKKALHMNSERRS   | >128        |
| NRC-123         | GWKDWFRKAKKVGKTVGGLALNHLYG   | 8           |
| NRC-124         | GIRKWFKKAHVGVGKVALNACL       | >128        |
| NRC-125         | GLKKWFKKAHVGVGKVALNAYLG      | 4-8         |
| NRC-126         | GWRKWIKKATHVGVGKHIGKAALDAYIG | 16          |
| NRC-127         | GCKKWFKKAHVGVGKVALNAYLG      | 128         |
| NRC-128         | GIRKWFKKAHVGVGKVALNAYLG      | 16-32       |

\*: The peptides with C-terminal amidation. The MICs were determined in triplicate experiments using a modified method as described in Materials and Methods.

**Table S2 Antimicrobial Activity of Fusion Peptides against Selected Bacterial Strains**

| Strains                           | MICs ( $\mu$ M) |       |       |       |
|-----------------------------------|-----------------|-------|-------|-------|
|                                   | NRC-4*          | IMB-1 | IMB-2 | IMB-3 |
| <i>S. mutans</i> UA159            | 1.0             | 2.2   | 2.8   | 44    |
| <i>S. mutans</i> GS5              | 1.0             | 2.2   | 2.8   | 44    |
| <i>S. mutans</i> NG8              | 1.5             | 2.2   | 2.8   | 44    |
| <i>S. mutans</i> Sm $\Delta$ comD | 1.0             | 8.8   | 11.3  | >44   |
| <i>S. sanguinis</i> SK108         | 2.5             | 8.8   | 22.6  | >44   |
| <i>S. gordonii</i> DL1            | 2.0             | 8.8   | 22.6  | >44   |

\*: NRC-4 is the parent of the fusion peptides, IMB-1, -2 and -3.

## Methods for NMR Spectroscopy

**Sample preparation.** Samples of peptides IMB-1, -2 and -3 were prepared for NMR analysis in 600 mL of 95/5 H<sub>2</sub>O/D<sub>2</sub>O (v/v) potassium phosphate buffer (pH 6.6) at final concentrations of 2.60 mM for IMB-1, 3.03 mM for IMB-2 and 2.32 mM for IMB-3. The samples were first lyophilized and resuspended in an aliquot of 1 M dodecylphosphocholine-D<sub>38</sub> or DPC-D<sub>38</sub> (Cambridge Isotope Labs, Andover, MA) to a final peptide:DPC ratio of 1:70. Samples were warmed to 60 °C for 5 min, lyophilized and re-suspended in 600 mL of 95/5 H<sub>2</sub>O/D<sub>2</sub>O (v/v).

**NMR analysis and data collection.** <sup>1</sup>H, <sup>13</sup>C and <sup>15</sup>N NMR data were collected on a Bruker AVANCE 700 spectrometer at a frequency of 700.23 MHz with a triple resonance cryoprobe. NMR spectra were collected at 303.2 K with the water frequency centered on the carrier frequency. <sup>1</sup>H chemical shifts were referenced to 2,2-dimethyl-2-silapentane-5-sulphonate through calibration of the water resonance at different temperatures (Gottlieb *et al.*, 1997, J Org Chem, 62:7512). <sup>13</sup>C and <sup>15</sup>N chemical shifts were indirectly referenced from the <sup>1</sup>H spectrum (Wishart *et al.*, 1995, J. Biomol NMR, 6:135). Sequential assignments were made for the backbone residues using a phase-sensitive <sup>1</sup>H-<sup>1</sup>H TOCSY (60 or 90 ms mixing time) or <sup>1</sup>H-<sup>1</sup>H NOESY (200 or 120 ms mixing time). NMR data was processed using Bruker TopSpin 2.1 and analyzed using SPARKY 3 (Goddard TD and Kneller DG, University of California). Interproton distances were measured by the integration in the 200 ms <sup>1</sup>H-<sup>1</sup>H NOESY. Interproton distances for proton pairs were calibrated using the nOe intensity for the signal between Ala Ha and Hb with a distance of 2.8 Å, and were classified into three groups (strong, medium and weak) corresponding to proton distance ranges of < 2.5, 2.5 – 3.5, 3.5 – 5.0 Å.

**Structural determination.** Structures of peptide IMB-1, IMB-2 and IMB-3 in DPC micelles were determined according to a simulated annealing protocol described previously (Syvitski *et al.*, 2005, Biochem. 44: 7282-7293) using the XPLOR 3.1 program (Schwieters *et al.*, 2003, J Magn Reson. 160: 65; Prog Nucl Magn Reson Spectrosc 2005, 48: 47).

**NMR Diffusion.** To determine if the peptides were associated with the DPC micelles, IMB-1, -2 and -3 were exchanged into D<sub>2</sub>O by lyophilizing and redissolving in 1 mL of D<sub>2</sub>O (99.99 atom %D), lyophilized and re-suspended in 600 uL of D<sub>2</sub>O to minimize the intensity of the HDO peak and used for DOSY measurements after structural analysis. <sup>1</sup>H detected 2D DOSY data sets were recorded using stimulated-echo sequence with bipolar-gradient pulses and 32 *t<sub>i</sub>* blocks of 4 transients each. The 2D data sets were processed using Bruker TopSpin 2.1 and the *t<sub>1</sub>* diffusion dimension was processed by fitting the rest of the F2 peaks to the equation:

$$A = A_0 \exp(-Dg^2\gamma^2\delta^2(\Delta-\delta/3))$$

Where A is the observed Area and A<sub>0</sub> is the reference intensity, D is the diffusion coefficient in m<sup>2</sup>s<sup>-1</sup>, γ is the <sup>1</sup>H gyromagnetic ratio (4257.7002 Hz G<sup>-1</sup>), δ is the total length of the bipolar de-focusing re-focusing gradient pulses, optimized for each sample (0.0015 to 0.0013 s), Δ is the diffusion time (0.30 to 0.25 s), g is the gradient strength which was 32 exponential increments between 1.703 and 32.354 G cm<sup>-1</sup>.

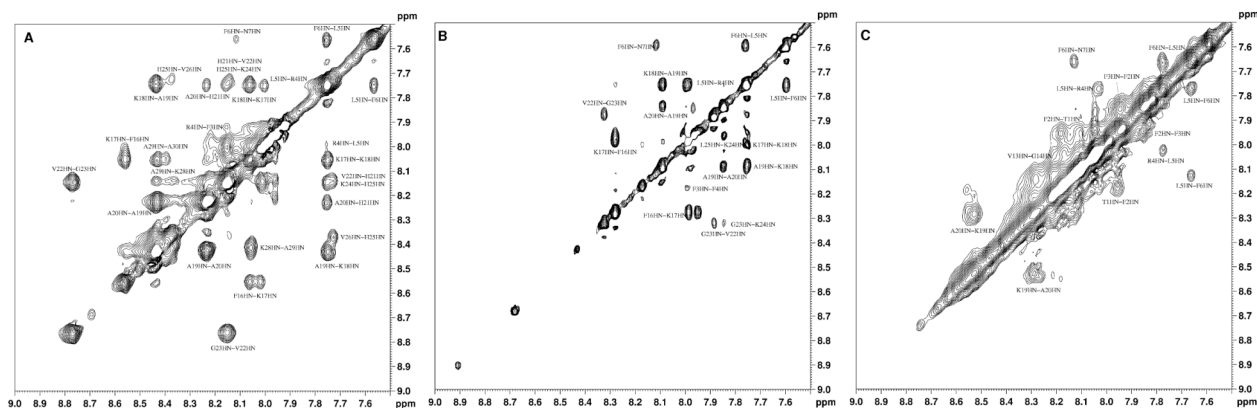

**Fig. S1.**  $H^N$ - $H^N$  regions of the  $^1H$ - $^1H$  NOESY (200 msec mixing time) for IMB-1 (A), IMB-2 (B) and IMB-3 (C) in dodecylphosphocholine- $D_{38}$  (DPC- $D_{38}$ ) micelles. IMB-1 (A) and IMB-2 (B) have reasonable chemical shift dispersion and the  $NN(i, i+1)$  connections, which suggest a helical structure, whereas considerably fewer  $NN(i, i+1)$  connections for IMB-3 indicates that it is unstructured and the  $H^N$ 's are rapidly exchanging with water, which is consistent with a random coil structure.

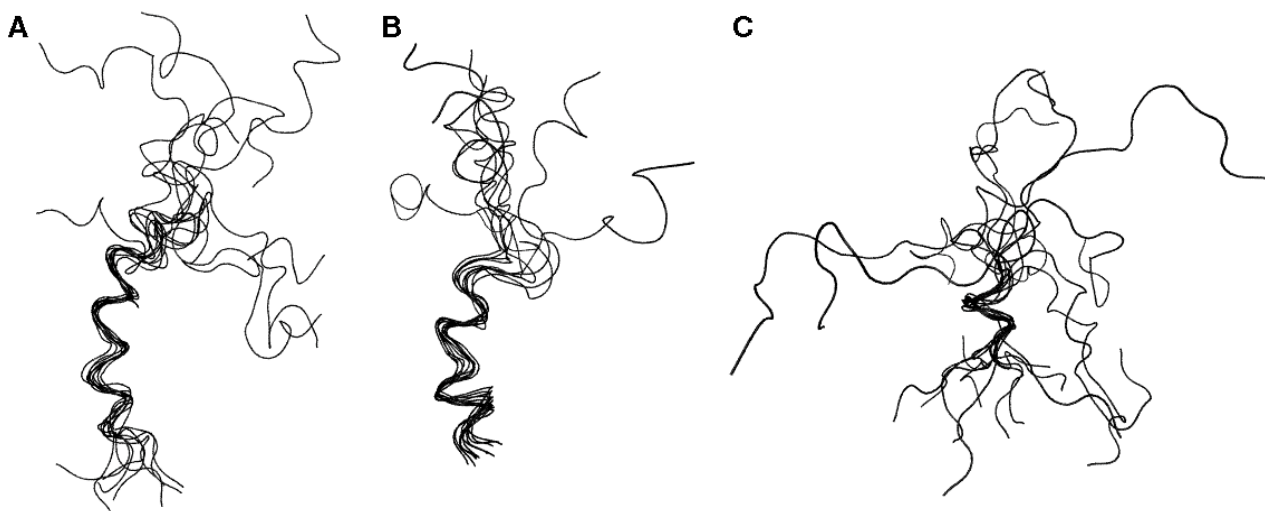

**Fig. S2.** An ensemble of the lowest energy structure of the fusion peptides IMB-1 (A), IMB-2 (B) and IMB-3 (C). Structured regions for each peptide are overlaid. IMB-1: residues 18-31 (r.m.s.d 1.33 to lowest energy structure) calculated from 182 nOe distance restraints; IMB-2: residues 12-23 (r.m.s.d 1.22 to lowest energy structure) calculated from 198 nOe distance restraints; IMB-3: residues 16-20 (r.m.s.d 1.02 to lowest energy structure) calculated from 114 nOe distance restraints. IMB-1 and IMB-2 form an amphipathic peptide with  $\alpha$ -helical character with a flexible linker between the targeting and killing domains, whereas IMB-3 is random coil in DPC- $d_{38}$  micelles.

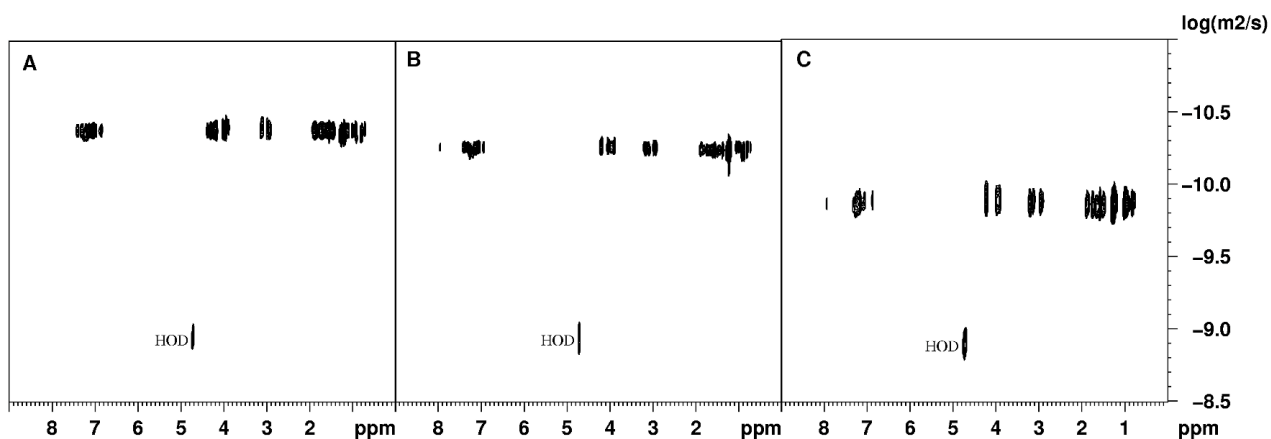

**Fig. S3.** DOSY spectra of the three fusion peptides in DPC micelles in which the F1 dimension represents the  $\log(D)$  (where  $D$  is the self-diffusion constant). Both IMB-1 (A) and IMB-2 (B) have a similar diffusion constant but not to IMB-3 (C), suggesting the IMB-3 is not diffusing with the DPC- $d_{38}$  micelles.

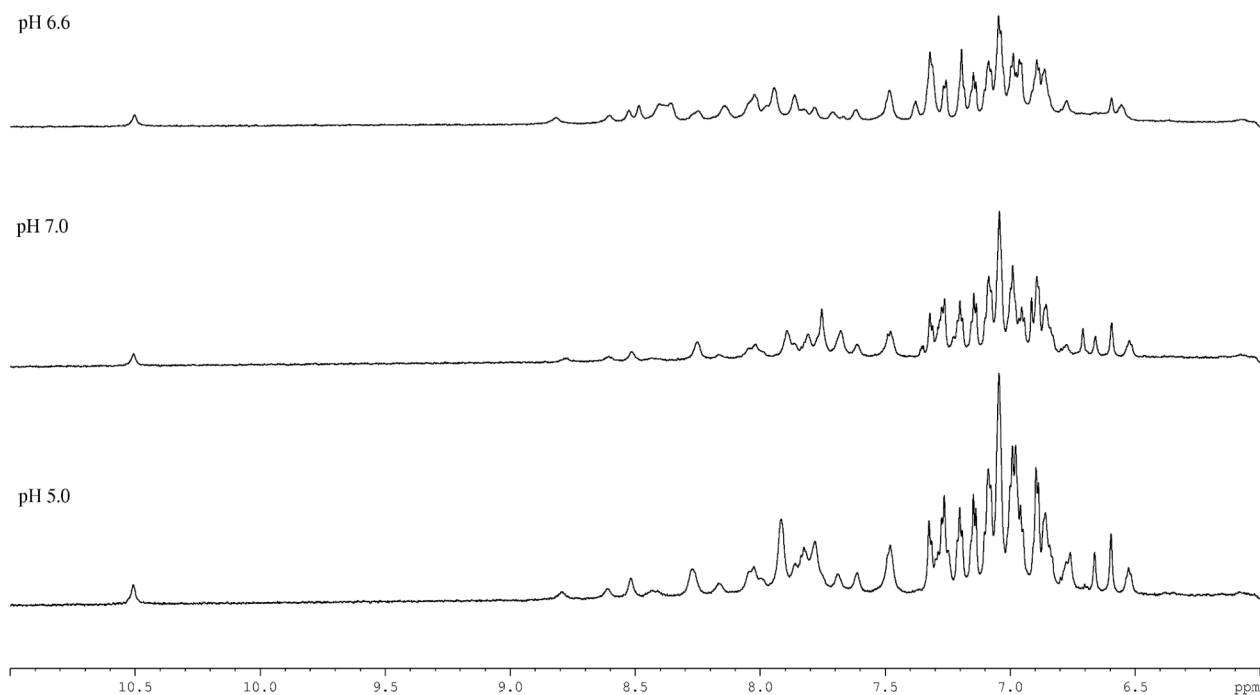

**Fig. S4.** 1-D  $^1\text{H}$  NMR spectra of IMB2-H/S14 at pH 6.6, 7.0 and 5.0 in DPC- $d_{38}$  micelles (peptide to lipid ratio 1:70). The peptide remains structured in a low pH environment.
